# Supplementary material
Source: PubMed Central journal article supplement (PMC4955061)
Supplement: thnov06p1619s1.pdf [file thnov06p1619s1.pdf]

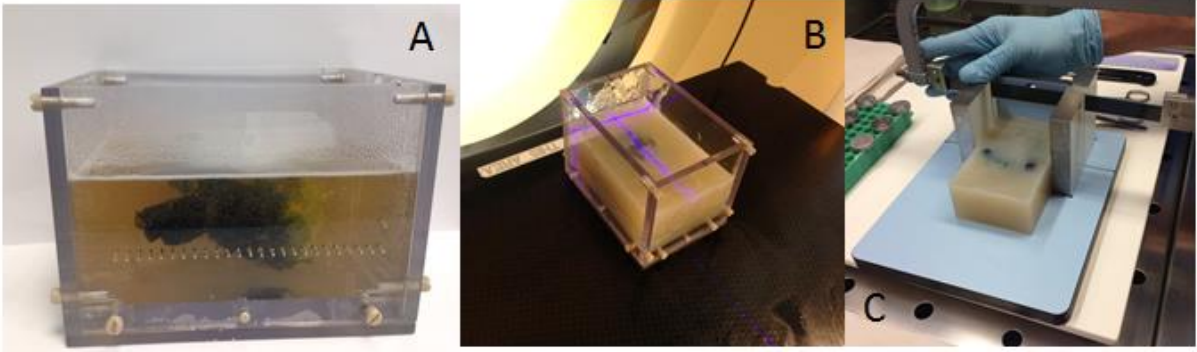

Supplementary Figure S1. The resected prostate was embedded by agar in a localizer with a 4 mm marker profile (A). Ex-vivo CT scan was performed by using reference points on the localizer for orientation (B). 4 mm step sections were cut in a cutting device (C).
